# Supplementary material for: Structural Insights into the Active Site Formation of DUSP22 in N-loop-containing Protein Tyrosine Phosphatases
Source: PubMed Central journal article supplement (PMC7589817; doi:10.3390/ijms21207515), 2020-10-12
Supplement: ijms-21-07515-s001.pdf [file ijms-21-07515-s001.pdf]

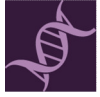

*Supporting Information*

# **Structural Insights into the Active Site Formation of DUSP22 in N-loop-containing Protein Tyrosine Phosphatases**

**Chih-Hsuan Lai<sup>1</sup>, Co-Chih Chang<sup>1</sup>, Huai-Chia Chuang<sup>2</sup>, Tse-Hua Tan<sup>2</sup>, and Ping-Chiang Lyu<sup>1\*</sup>**

<sup>1</sup>Institute of Bioinformatics and Structural Biology, Department of Life Science, National Tsing Hua University, Hsinchu 30013, Taiwan; chsuan.l@gmail.com (C.-H.L.); cochihchang@gmail.com (C.-C.C.)

<sup>2</sup>Immunology Research Center, National Health Research Institutes, Zhunan 35053, Taiwan; cinth@nhri.org.tw (H.-C.C.); ttan@nhri.org.tw (T.-H.T.)

\*Corresponding Author: Ping-Chiang Lyu;

E-mail: pclyu@mx.nthu.edu.tw; Tel.: 886-3574-2762; Fax: 886-3571-5934.

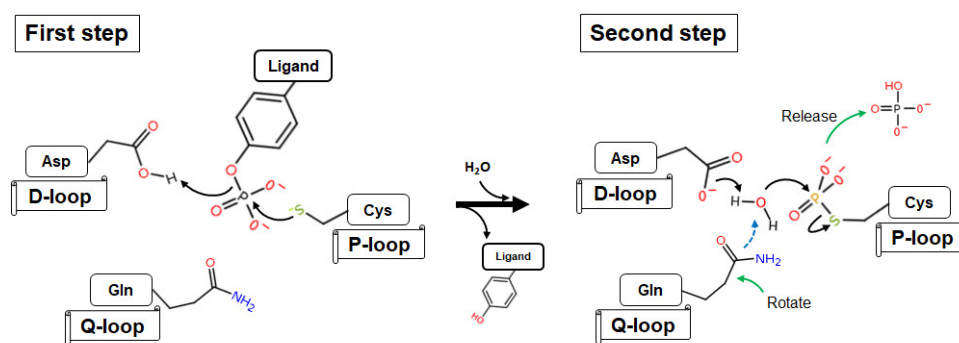

**Figure S1.** The catalytic reaction in Q-loop-containing PTPs. The model of two catalytic steps in PTP1B.

|            |                |                                           | D-loop                                       | P-loop                                     | N-loop                          |           |
|------------|----------------|-------------------------------------------|----------------------------------------------|--------------------------------------------|---------------------------------|-----------|
| MKPs       | DUSP1          | P28562                                    | PVEDNHKADISSWFNEAIDFIDSIK-NAGGRVVFVHCQAGISR  | SATICLAYLMRTRNRVKLDEAFDFVKQRRSIISE         | PNFSFMGQL                       |           |
|            | DUSP2          | Q05923                                    | PVEDNQMVEISAWFQEAIGFIDWVK-NSGGRVLVHCQAGISR   | SATICLAYLMQSRVRRLDEAFDFVKQRRGVISE          | PNFSFMGQL                       |           |
|            | DUSP4          | Q13115                                    | PVEDNHKADISSWFMEAIEYIDAVK-DCRGRVLVHCQAGISR   | SATICLAYLMKKRVRLEAFDFVKQRRSIISE            | PNFSFMGQL                       |           |
|            | DUSP5          | Q16690                                    | PVEDSHADTASSHFQEAIDFIDCVR-EKGGKVLVHCQAGISR   | SPTICMAYLMKTKQFRLEAFDYIKQRRSMVSE           | PNFNGFMGQL                      |           |
|            | DUSP6          | Q16828                                    | PISDHWSONLSQFPPEAISFIDEAR-GKNCQVLVHCQAGISR   | SVTVTVAYLMQKLNLSMNDAYDIVKMKKSNISE          | PNFNGFMGQL                      |           |
|            | DUSP7          | Q16829                                    | PISDHWSONLSQFPPEAISFIDEAR-SKKCGVLVHCQAGISR   | SVTVTVAYLMQKMNLSLNDAYDFVKKKSNISE           | PNFNGFMGQL                      |           |
|            | DUSP8          | Q13202                                    | PINDNYCEKLLPWLDKSIEFIDKAK-LSSCGVIVHCQAGISR   | SATIAIAYIMKTMGMSSDDAYRFVKDRRPSISE          | PNFNGFMGQL                      |           |
|            | DUSP9          | Q99956                                    | PISDHWSONLSRFFPEAIEFIDEAL-SQNCQVLVHCQAGISR   | SVTVTVAYLMQKLNLSMNDAYDLVKKKSNISE           | PNFNGFMGQL                      |           |
|            | DUSP10         | Q9Y6W6                                    | PATDSNKQNLRYFEEAFEFIEEAH-QCGKGLLHCQAGISR     | SATIVIAYLMKHTRMTMTDAYKFKVKKRPIISE          | PNLNGFMGQL                      |           |
|            | DUSP16         | Q9BY84                                    | PVNDSPCEKILPWLDKSVDFIEKAK-ASNGCVLVHCQAGISR   | SATIAIAYIMKRMDSLDEAYRFVKEKRPTISE           | PNFNGFMGQL                      |           |
|            | STYXL1         | Q9Y6J8                                    | RIEDSPEAQILPFLRHMCFIEIHH-HLGSVILIFSTQGISR    | SCAAIIAYLMHMSNEQTLQRSWAYVKCKKNMCE          | PNRGLVHQL                       |           |
|            | Atypical DUSPs | DUSP3                                     | P51452                                       | KANDTQEFNLSAYFERAADFIDQALAQKNGRVLVHCQAGISR | SPTLVIAIYLMRQKMDVKALSIVRQNR-IG  | PNNGFLAQL |
|            |                | DUSP12                                    | Q9UNI6                                       | PALDKPETDLSHLDRCVAFIQAR-AEGRVLVHCQAGISR    | SVAIITAFLMKTDQLPFEKAYEKLIKPEAKM | NEGFWEQL  |
| DUSP13A    |                | Q6B8I1                                    | PAHDLPDFDISAYFSSAADFIHRLNTPGAKVLVHCQAGISR    | SATLVLAYLMLHQRSLRQAVITVRQHRN-V             | PNRGLHQL                        |           |
| DUSP13B    |                | Q9UII6                                    | EADDNPFDFLSVYFLPVARYIRAALSVQGRVLVHCQAGISR    | SATLVLAFLMICENMTLVEAIQTVQHRN-I             | CNSGFLRQL                       |           |
| DUSP14     |                | Q95147                                    | PLADMPHAPIGLYFDTVADKIHVS-RKHGATLVHCQAGISR    | SATLCIAYLMKPHNVCLLEAYNWKARRPVI             | PNVGFWRQL                       |           |
| DUSP15     |                | Q9H1R2                                    | PVADTPEVPIKHFKECINFIHCCR-LNGGNCLVHCQAGISR    | STTIVTAYVMTVTGLGWRDVLLEAIKATRP             | IANPNPGRQQL                     |           |
| DUSP18     |                | Q8NEJ0                                    | PVADSPNSRLCDFEPIADHHSVE-MKQGRLLHCQAGISR      | SALCLAYLMKYHMSLLDAHTWTKSCRPI               | IRPNNGFWEQL                     |           |
| DUSP19     |                | Q8WTR2                                    | SILLPETNLSYFPECFEFIEEAK-RKDGVLVHCQAGISR      | RAAIVIGFLMNSQTSFTSAFSLVKNARPSI             | CNSGFMQL                        |           |
| DUSP21     |                | Q9H596                                    | PVTDARDSRIDYDFDPIADLIHTID-MRQGRLLHCQAGISR    | SALCLAYLMKYHMSLLDAHTWTKSRP                 | IRPNNGFWEQL                     |           |
| DUSP22     |                | Q9NRW4                                    | PAADSPSQNLTRHFKEKIKFIHECR-LRGSCLVHCQAGISR    | SVTLVIAIYIMTVDFGWE DALHTVRAGRSCAN          | PNVGFQRQL                       |           |
| DUSP26     |                | Q9BV47                                    | EADHSPAFDMSIHFQTAADFIHRAALSQGGKILVHCQAGISR   | SATLVLAYLMLYHHLTLVEAIKVKVDHRG-I            | PNRGLRQL                        |           |
| DUSP27     |                | Q5VZP5                                    | EVDDFPEVDISQHFRAKSEFLDEALLTYRQKVLVHCQAGISR   | SATLVVAYLMI PHNMAILEALMTVRKKRA-I           | YPNRGLKQL                       |           |
| DUPD1      |                | Q68J44                                    | EADDLPTFDLSVFFYPAAAFIDRALSDHDKILVHCQAGISR    | SATLVLAYLMIHKMDTLVDAIQQVAKNRC-V            | PNRGLKQL                        |           |
| DUSP28     | Q4G0W2         | PVFDPAEDLLAHLEPTCAAMEAAV-RAGGACLVHCQAGISR | SAAVCTAYLMRHRGLSLAKAFQMVKSARPAE              | PNPFWSQL                                   |                                 |           |
| STYX       | Q8WUJ0         | DIADNPVENIIRFFPMTKFIDGSL-QMGKVLVHCQAGISR  | SAAFVIAIYIMTFGMKYRDAFAYVQERRFCIN             | PNAGFVHQL                                  |                                 |           |
| Slingshots | SSH1           | Q8WYL5                                    | RVYDEETDILLAHWNEAYHFINKAK-RNHSKCLVHCQAGISR   | SASTVIAIYAMKEFGWPLEKAYNYVKQKRSITR          | PNAGFMRQL                       |           |
|            | SSH2           | Q76I76                                    | RVYDEEATDILLAYWNTDYKFI SKAK-KHGSKCLVHCQAGISR | SASTVIAIYAMKEYGNLDRAYDYKERRRTVTK           | PNPSFMGQL                       |           |
|            | SSH3           | Q8TE77                                    | RLWDEESAQLLPHWKETHRFIEAAR-AQGTVLVHCQAGISR    | SAATVLAYAMKQYECESLEQALRHVQELRPTARE         | PNPGLFQL                        |           |

**Figure S2. List of N-loop-containing PTPs.** The 29 Cys-based PTPs contain the N-loop among three subfamilies, MKPs, atypical DUSPs, and Slingshots. All of the members contain the characteristic of the PND-triloop interaction (red circle), including the conserved aspartate in the D-loop, the conserved serine in the P-loop, and the conserved asparagine in the N-loop. The members include three pseudophosphatases (DUSP27, STYX, and STYXL1), which are inactive phosphatases because the catalytic cysteine is changed. DUSP11 and DUSP23 are not included in this alignment because they do not have this characteristic.

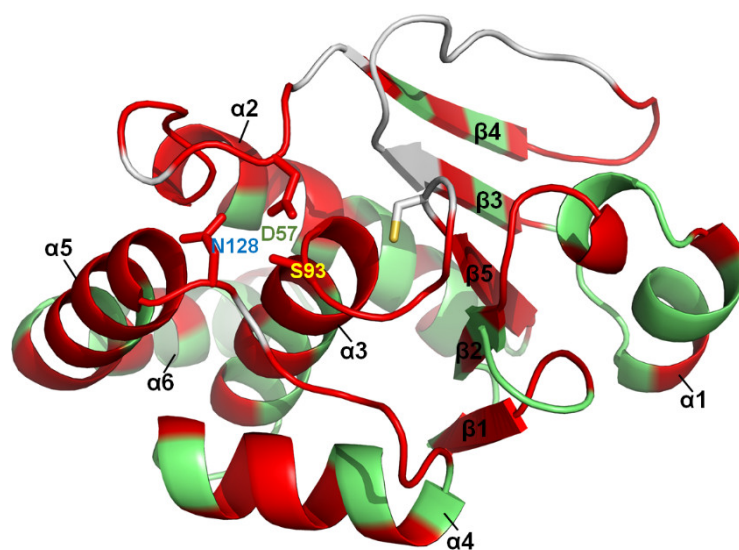

**Figure S3. The perturbation region of S93N and N128A mutations.** The chemical shifts of the mutations that differed from the WT are labeled on the protein structure in red. This includes the signal that probably disappeared in S93N and N128A mutations. S93N and N128A had similar effects in perturbing the solution conformation of the D-loop, P-loop, and N-loop. The residues in the surrounding structure were also affected by the conformational changes of three loops, such as  $\beta 1$ ,  $\beta 5$ , and  $\alpha 2$ - $\alpha 5$ . The white residues were nonassigned residues in the backbone assignment, including proline and the disappeared signals in the 3D spectra of WT.

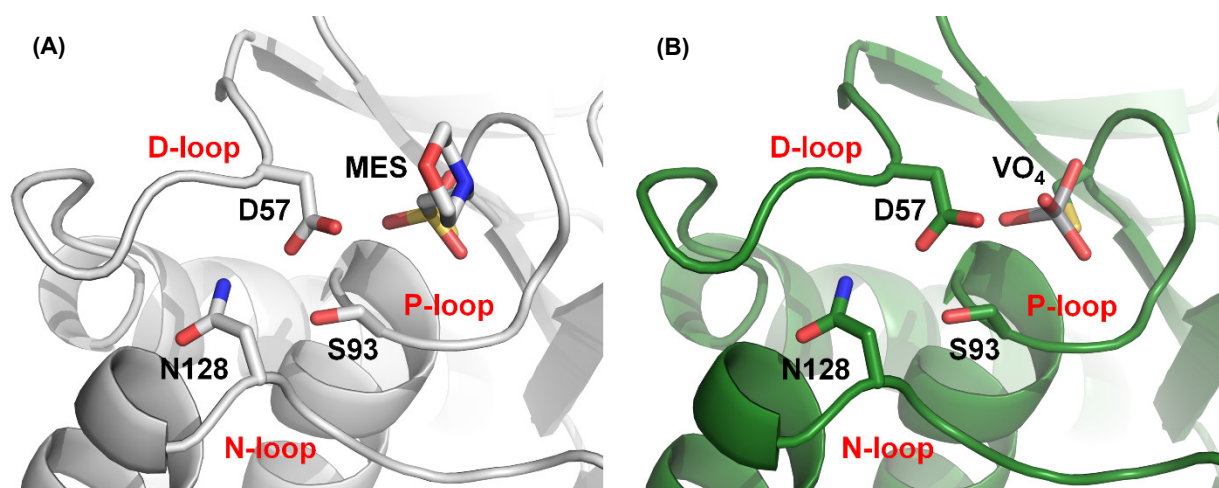

**Figure S4. The two catalytic steps of DUSP22.** (A) The crystal structure in the first catalytic step bound with a pTyr-like ligand, MES (PDB ID: 1WRM). (B) The crystal structure in the second catalytic step bound with a ligand, vanadate (VO<sub>4</sub>). In alignment, N128 in DUSP22 was considered to replace the role of Q262 in PTPB. However, N128 in DUSP22 did not rotate during two catalytic steps as Q262 did in PTP1B. The N128 in the N-loop was far from ligand (>7 Å) and did not participate in water stabilization for hydrolysis.

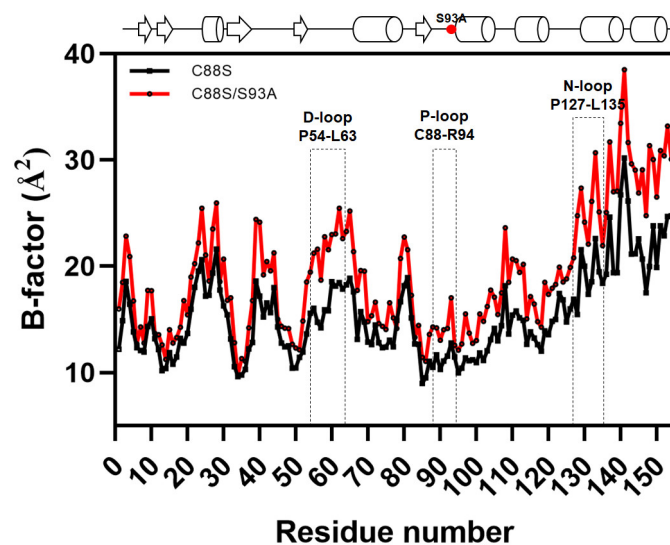

**Figure S5.** The B-factor of C $\alpha$  in the crystal structure of C88S and C88S/S93A. The crystals of C88S and C88S/S93A grew in the same reservoir solution and formed the same space group, and so the comparison of B-factor reflected the positional disorder in the S93A mutant. C88S is shown by the black line, and C88S/S93A is shown by the red line. The S93A mutation induced the B-factor increase in the crystal structure, suggesting that the three loops became flexible and induced unstable active site.

**Table S1. The somatic mutations equivalent to S93 (black) and N128 (red) in cancer databases**

|        | Mutation                 | Tumor type                  | Tumor subtype                      | Reference ID <sup>a</sup> |
|--------|--------------------------|-----------------------------|------------------------------------|---------------------------|
| DUSP2  | N297S                    | Esophageal cancer           | Esophageal adenocarcinoma          | ICGC (ID: MU132377584)    |
| DUSP4  | S285L                    | Bladder cancer              | Transitional cell carcinoma        | ICGC (ID: MU4624050)      |
|        |                          | Bladder cancer              | Urothelial carcinoma               |                           |
|        |                          | Colorectal cancer           | Adenocarcinoma                     |                           |
|        |                          | Ovarian cancer              | Serous cystadenocarcinoma          |                           |
| DUSP6  | S298G                    | Prostate cancer             |                                    | ICGC (ID: MU121368750)    |
| DUSP15 | N125D                    | Lung cancer                 | Squamous cell carcinoma            | ICGC (ID: MU1328471)      |
| DUSP16 | S249F                    | Liver cancer                | Hepatocellular carcinoma           | ICGC (ID: MU112731400)    |
| DUSP19 | S155F                    |                             | Malignant melanoma                 | COSMIC (ID: COSV61193521) |
|        |                          | Breast cancer               | ER-PR-positive carcinoma           | COSMIC (ID: COSV61193521) |
| DUSP21 | S111N                    | Colorectal cancer cell line | Adenocarcinoma                     | COSMIC (ID: COSV59133864) |
| DUSP22 | S93F                     | Skin cancer                 | Basal cell carcinoma               | COSMIC (ID: COSV60529532) |
|        | N128 <sup>deletion</sup> | Colorectal cancer cell line | Adenocarcinoma                     | COSMIC (ID: COSV60529373) |
| STYX   | N160D                    | Breast cancer               | Ductal carcinoma                   | ICGC (ID: MU65717225)     |
| DUPD1  | N186K                    | Gastric cancer              | Multiple histological subtypes     | ICGC (ID: MU121096102)    |
| SSH3   | N453K                    | Bladder cancer              | Invasive urothelial bladder cancer | ICGC (ID: MU131862676)    |

<sup>a</sup> The somatic mutations are reported by the ICGC and COSMIC databases [1,2].

**Table S2. The somatic mutations in the P-loop, D-loop, and N-loop of DUP22 in cancer databases**

| Loop   | Mutation                 | Tumor type                           | Tumor subtype                        | Reference ID <sup>a</sup> |
|--------|--------------------------|--------------------------------------|--------------------------------------|---------------------------|
| D-loop | A56V                     | Gastric cancer                       | Adenocarcinoma                       | ICGC (ID: MU1821692)      |
|        |                          | Endometrial cancer                   | Uterine corpus endometrial carcinoma |                           |
|        | D57N                     | Pediatric Brain Tumor                | Multiple subtypes                    | ICGC (ID: MU127238269)    |
|        |                          | Brain cancer                         | Glioblastoma multiforme              |                           |
|        | S58L                     | Skin cancer                          | Squamous cell carcinoma              | COSMIC (ID: COSV60523881) |
|        |                          | Skin cancer                          | Cutaneous melanoma                   | ICGC (ID: MU4512779)      |
|        | P59S                     | Brain cancer                         | Lower grade glioma                   | ICGC (ID: MU130895128)    |
|        | P59Q                     | Lung cancer                          | Adenocarcinoma                       | ICGC (ID: MU131619769)    |
| L63M   | Endometrial cancer       | Uterine corpus endometrial carcinoma | ICGC (ID: MU129908241)               |                           |
| P-loop | C88Y                     | Brain cancer                         | Glioblastoma multiforme              | ICGC (ID: MU129123398)    |
|        | A90V                     | Skin cancer                          | Cutaneous melanoma                   | ICGC (ID: MU129925934)    |
|        | G91A                     | Breast cancer                        | Ductal & lobular                     | ICGC (ID: MU131715533)    |
|        | G91W                     | Lung cancer                          | Adenocarcinoma                       | ICGC (ID: MU131760231)    |
|        | G91E                     | Skin cancer                          | Cutaneous melanoma                   | ICGC (ID: MU129904012)    |
|        | S93F                     | Skin cancer                          | Basal cell carcinoma                 | COSMIC (ID: COSV60529532) |
|        | R94M                     | Lung cancer                          | Adenocarcinoma                       | ICGC (ID: MU131780295)    |
| N-loop | N128 <sup>deletion</sup> | Colorectal cancer cell line          | Adenocarcinoma                       | COSMIC (ID: COSV60529373) |
|        | V129M                    | Gastric cancer                       | Adenocarcinoma                       | ICGC (ID: MU6171254)      |
|        | G130C                    | Esophageal cancer                    | Esophageal adenocarcinoma            | ICGC (ID: MU37138925)     |
|        | G130D                    | Lung cancer                          | Adenocarcinoma                       | ICGC (ID: MU131506908)    |

<sup>a</sup> The somatic mutations are reported by the ICGC and COSMIC databases [1,2].



**Table S3. The crystallization conditions for the WT and mutants**

| Mutant             | Protein concentration | Reservoir solution                                                                                                                                                                                       |
|--------------------|-----------------------|----------------------------------------------------------------------------------------------------------------------------------------------------------------------------------------------------------|
| WT_VO <sub>4</sub> | 6.1 mg/ml             | 0.1 M MES (pH 6.5), 2 mM MnCl <sub>2</sub> , 0.1 mM Na <sub>3</sub> VO <sub>4</sub> , 25% PEG 4,000<br><u>Soaking solution:</u> 0.1 M MES (pH 6.5), 5 mM Na <sub>3</sub> VO <sub>4</sub> , 25% PEG 4,000 |
| C88S               | 12.7 mg/ml            | 0.2 M imidazole (pH 8.0), 0.4 M NaH <sub>2</sub> PO <sub>4</sub> , 1.6 M K <sub>2</sub> HPO <sub>4</sub> , 0.2 M NaCl                                                                                    |
| C88S/S93N          | 7.7 mg/ml             | 0.05 M arginine, 0.05 M glutamic acid (pH 7.5), 0.4 M NaH <sub>2</sub> PO <sub>4</sub> , 1.6 M K <sub>2</sub> HPO <sub>4</sub> , 0.2 M NaCl                                                              |
| C88S/S93A          | 3.5 mg/ml             | 0.2 M imidazole (pH 8.0), 0.4 M NaH <sub>2</sub> PO <sub>4</sub> , 1.6 M K <sub>2</sub> HPO <sub>4</sub> , 0.2 M NaCl                                                                                    |
| N128D              | 8.4 mg/ml             | 0.1 M PIPES (pH 6.7), 30% PEG 3,350, 0.2 M Li <sub>2</sub> SO <sub>4</sub>                                                                                                                               |
| N128A              | 7.0 mg/ml             | 0.1 M HEPES (pH 7.5), 30% PEG 3,350, 0.2 M Li <sub>2</sub> SO <sub>4</sub>                                                                                                                               |

Table S4. Data collection and structural refinement statistics

|                                       | WT_VO <sub>4</sub>        | C88S                      | C88S/S93N                 | C88S/S93A                 | N128D                     | N128A                       |
|---------------------------------------|---------------------------|---------------------------|---------------------------|---------------------------|---------------------------|-----------------------------|
| <b>Data collection</b>                |                           |                           |                           |                           |                           |                             |
| Space group                           | P 1 2 1                   | C 1 2 1                   | C 1 2 1                   | C 1 2 1                   | C 1 2 1                   | C 1 2 1                     |
| <u>Cell dimensions</u>                |                           |                           |                           |                           |                           |                             |
| a, b, c (Å)                           | 36.1, 49.7, 39.8          | 89.6, 49.7, 39.8          | 90.0, 50.2, 40.9          | 89.7, 50.2, 39.7          | 90.3, 50.7, 41.1          | 89.8, 50.4, 40.2            |
| $\alpha, \beta, \gamma$ (°)           | 90.0, 108.1, 90.0         | 90.0, 94.7, 90.0          | 90.0, 93.6, 90.0          | 90.0, 94.9, 90.0          | 90.0, 91.3, 90.0          | 90.0, 96.0, 90.0            |
| Resolution (Å)                        | 50.00-1.38<br>(1.43-1.38) | 30.00-1.36<br>(1.41-1.36) | 30.00-1.53<br>(1.58-1.53) | 30.00-1.50<br>(1.55-1.50) | 30.00-1.69<br>(1.75-1.69) | 30.00 - 1.31<br>(1.36-1.31) |
| R <sub>int</sub>                      | 0.048 (0.353)             | 0.020 (0.134)             | 0.023 (0.187)             | 0.034 (0.393)             | 0.028 (0.222)             | 0.033 (0.388)               |
| I / sigma                             | 18.9 (2.9)                | 36.2 (5.9)                | 46.5 (4.1)                | 22.5 (2.4)                | 24.4 (4.2)                | 22.0 (2.1)                  |
| Completeness (%)                      | 97.9 (95.1)               | 97.3 (95.9)               | 98.3 (91.0)               | 99.5 (99.7)               | 98.4 (92.4)               | 98.6 (97.4)                 |
| Redundancy                            | 5.6 (3.3)                 | 3.8 (3.8)                 | 3.4 (2.5)                 | 3.6 (3.4)                 | 3.5 (3.3)                 | 3.7 (3.7)                   |
| <b>Refinement</b>                     |                           |                           |                           |                           |                           |                             |
| Resolution (Å)                        | 28.26-1.38<br>(1.43-1.38) | 22.33-1.36<br>(1.41-1.36) | 22.47-1.53<br>(1.58-1.53) | 25.61-1.50<br>(1.55-1.50) | 25.87-1.69<br>(1.75-1.69) | 22.53 - 1.31<br>(1.36-1.31) |
| No. of reflections                    | 27061                     | 36406                     | 27122                     | 28187                     | 20584                     | 42475                       |
| R <sub>work</sub> / R <sub>free</sub> | 0.2041/0.2287             | 0.1797/0.1954             | 0.1717/0.1957             | 0.1820/0.2129             | 0.1919/0.2192             | 0.1874 / 0.1965             |
| <u>No. of atoms</u>                   |                           |                           |                           |                           |                           |                             |
| Protein                               | 1248                      | 1248                      | 1246                      | 1243                      | 1211                      | 1241                        |
| Ligand/ion                            | 5                         | 5                         | 5                         | 5                         | 5                         | 5                           |
| Water                                 | 98                        | 185                       | 133                       | 111                       | 78                        | 154                         |
| <u>B-factors</u>                      |                           |                           |                           |                           |                           |                             |
| Protein                               | 19.6                      | 17.6                      | 18.7                      | 21.7                      | 25.0                      | 18.7                        |
| Ligand/ion                            | 16.5                      | 11.8                      | 12.0                      | 15.6                      | 19.4                      | 13.4                        |
| Water                                 | 28.4                      | 29.7                      | 29.6                      | 32.5                      | 33.6                      | 29.2                        |
| <u>RMS. deviations</u>                |                           |                           |                           |                           |                           |                             |
| Bond lengths (Å)                      | 0.006                     | 0.005                     | 0.005                     | 0.005                     | 0.006                     | 0.005                       |
| Bond angles (°)                       | 1.199                     | 0.776                     | 0.807                     | 0.775                     | 0.793                     | 0.792                       |
| Ramachandran favored (%)              | 96                        | 96                        | 96                        | 96                        | 97                        | 96                          |
| Ramachandran outlier (%)              | 0                         | 0                         | 0                         | 0                         | 0                         | 0                           |
| PDB ID                                | 6LVQ                      | 6L1S                      | 6LOU                      | 6LMY                      | 6LOT                      | 7C8S                        |

## References

1. Zhang, J.; Bajari, R.; Andric, D.; Gerthoffert, F.; Lepsa, A.; Nahal-Bose, H.; Stein, L.D.; Ferretti, V. The International Cancer Genome Consortium Data Portal. *Nat Biotechnol* **2019**, *37*, 367-369, doi:10.1038/s41587-019-0055-9.
2. Tate, J.G.; Bamford, S.; Jubb, H.C.; Sondka, Z.; Beare, D.M.; Bindal, N.; Boutselakis, H.; Cole, C.G.; Creatore, C.; Dawson, E., et al. COSMIC: the Catalogue Of Somatic Mutations In Cancer. *Nucleic Acids Res* **2019**, *47*, D941-D947, doi:10.1093/nar/gky1015.

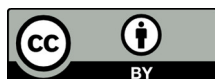

© 2020 by the authors. Licensee MDPI, Basel, Switzerland. This article is an open access article distributed under the terms and conditions of the Creative Commons Attribution (CC BY) license (<http://creativecommons.org/licenses/by/4.0/>).
